# Supplementary material
Source: PubMed Central journal article supplement (PMC3359603)
Supplement: supp_en.2012-1069_en-12-1069_.pdf [file supp_en.2012-1069_en-12-1069_.pdf]

## Supplemental Figure Legends

Supplemental Figure 1. Polyp burden in *Apc<sup>Min/+</sup>* mice is not affected by the *Vip* genotype. Polyp count and average polyp diameter along the gastrointestinal tract in *Apc<sup>Min/+</sup>:Vip+/+* mice (n=12) and *Apc<sup>Min/+</sup>:Vip-/-* littermates (n=14). The small intestine was divided into three equal segments (proximal, middle and distal) for polyp assessment.

Supplemental Figure 2. Relative levels of Glp2r and a variety of regulatory peptide/growth factor mRNA transcripts in the jejunum and colon of *Vip-/-* and *Vip+/+* mice as determined by real-time quantitative RT-PCR (n=6-8 mice per group). The statistical significance for the comparison of *Vip-/-* vs *Vip+/+* is indicated. Data are representative of at least 3 independent experiments.

Supplemental Fig 3. Relative small intestine (SI) weight and jejunal villus height and crypt depth in *Vip+/+* and *Vip-/-* male (top panels) and female (bottom panels) mice after 10 days of oral dextran sulphate and vehicle or GLP-2 treatment as indicated in the legend of Fig 6. Each data point corresponds to one mouse. The statistical significance for the comparisons is shown in each panel.

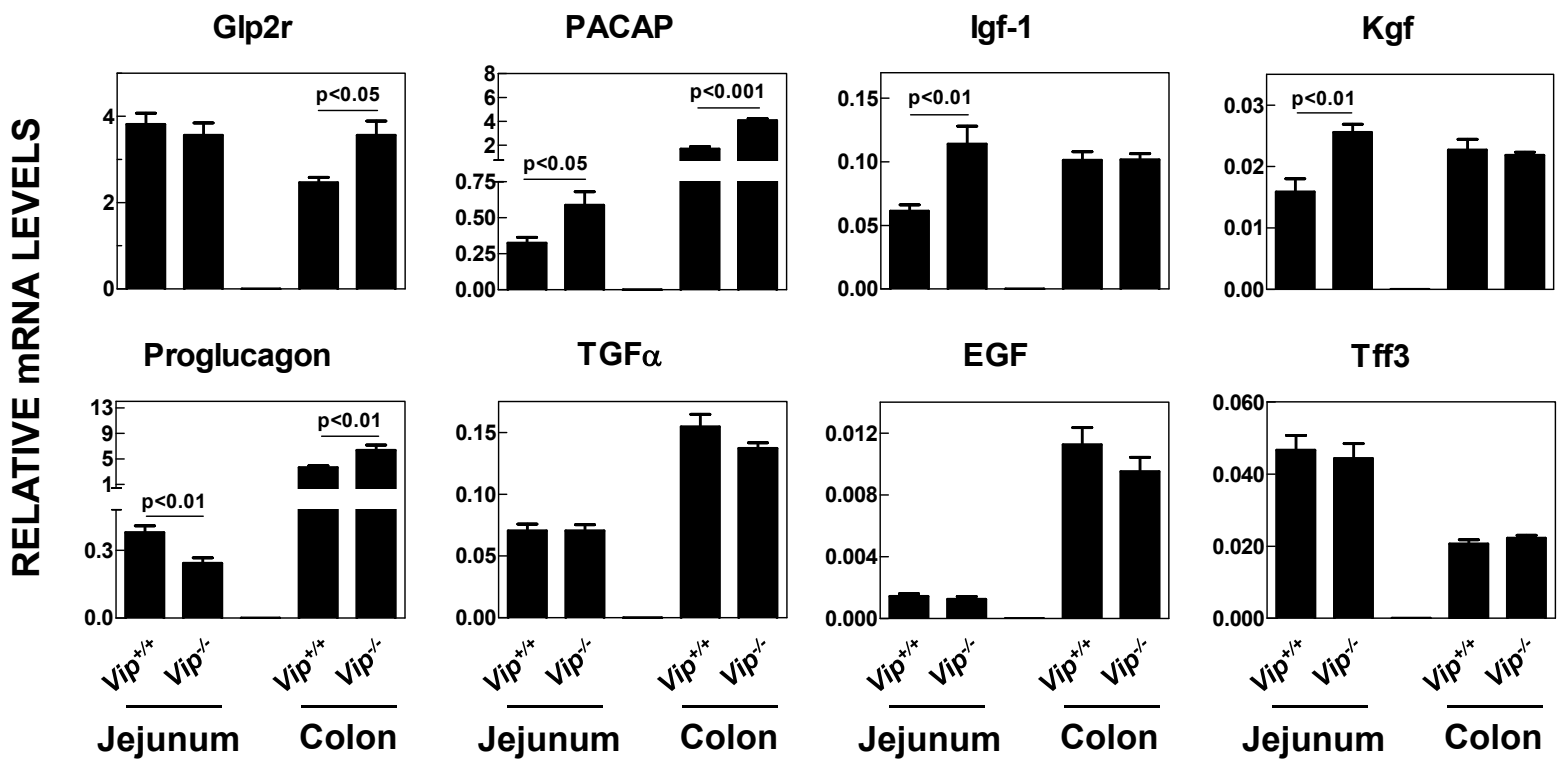

Supplemental Figure 1

## SMALL INTESTINE

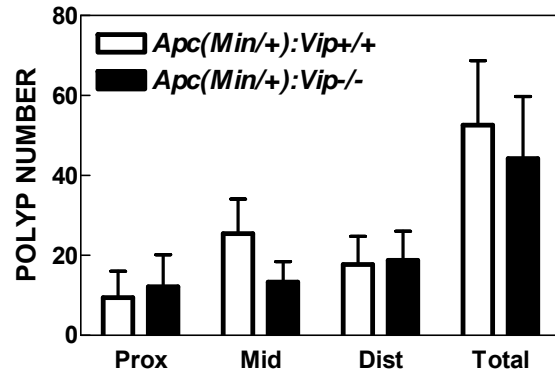

## COLON

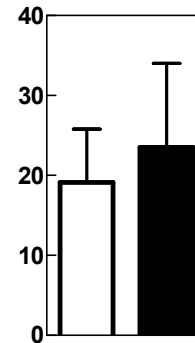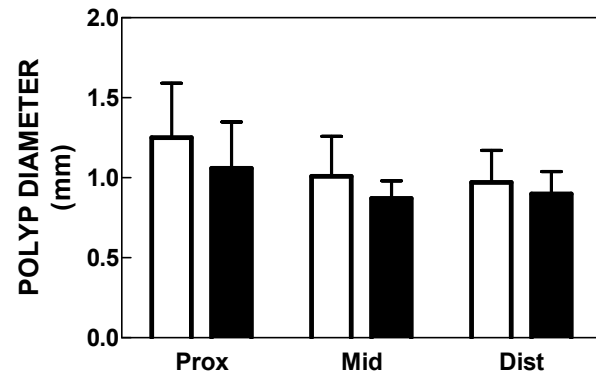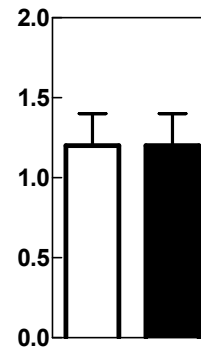

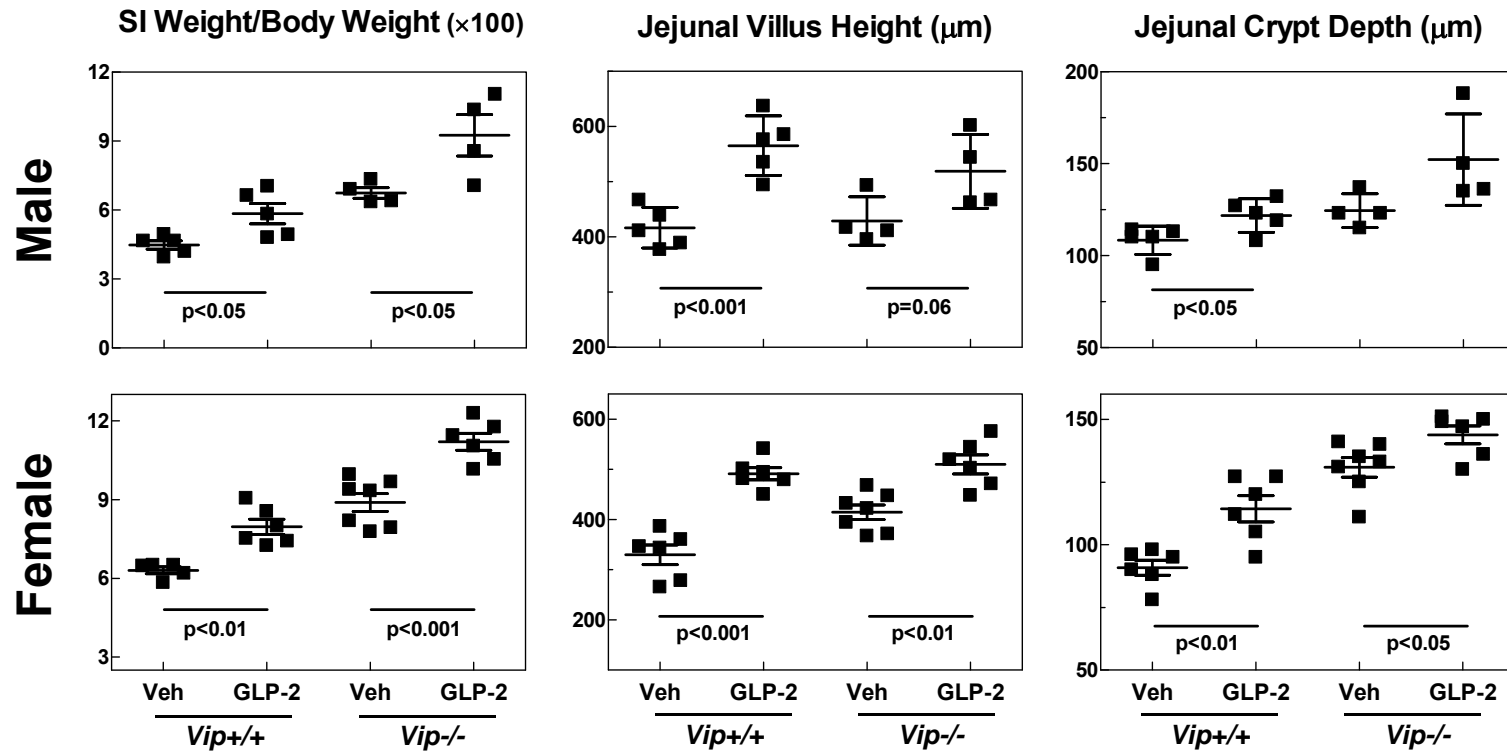

Supplemental Figure 3
